# Supplementary material for: Predicting venous thromboembolism following laparoscopic bariatric surgery: development of the BariClot tool using the MBSAQIP database
Source: Springer Nature journal article supplement (doi:10.1007/s00464-018-6348-0), 2018-07-12
Supplement: MOESM1 [file 15948810]

Supplementary Table 1: Observed compared to predicted probabilities of VTE by Caprini(19) risk categories

| Points | Risk Category | Predicted risk without chemoprophylaxis (%) | Observed risk (%) mean (SD) | Total  n |
| --- | --- | --- | --- | --- |
| 0-1 | Low | 0 | 0.3 (0.06) | 13,690 |
| 2 | Moderate | 0.7 | 0.3 (0.06) | 15,282 |
| 3-4 | High | 1 | 0.4 (0.06) | 162,185 |
| ≥ 5 | Highest | 1.9 | 0.5 (0.07) | 83,064 |
